# Supplementary material
Source: HighWire-hosted journal article supplement (https://bmjopen.bmj.com/content/11/7/e043785)
Supplement: inline-supplementary-material-1 [file inline-supplementary-material-1.pdf]

**Supplementary Tables:****Table S1.** Mean scores of impulsivity for each tertile, grouping by gender

|                 | Total impulsivity |             | AI          |             | MI          |             | NPI         |             |
|-----------------|-------------------|-------------|-------------|-------------|-------------|-------------|-------------|-------------|
|                 | Boys              | Girls       | Boys        | Girls       | Boys        | Girls       | Boys        | Girls       |
| Lowest tertile  | 1.71 (0.16)       | 1.70 (0.17) | 1.61 (0.16) | 1.60 (0.16) | 1.63 (0.17) | 1.63 (0.17) | 1.61 (0.25) | 1.61 (0.25) |
| Middle tertile  | 2.05 (0.08)       | 2.05 (0.08) | 2.00 (0.10) | 2.01 (0.10) | 2.03 (0.10) | 2.05 (0.10) | 2.14 (0.10) | 2.14 (0.10) |
| Highest tertile | 2.43 (0.19)       | 2.40 (0.20) | 2.49 (0.26) | 2.44 (0.24) | 2.58 (0.30) | 2.54 (0.27) | 2.61 (0.25) | 2.62 (0.24) |
| Skewness        | 0.24              | 0.24        | 0.45        | 0.48        | 0.76        | 0.64        | 0.05        | -0.05       |

**Table S2.** Factors associated with bullying among all samples: results of a multivariable binary logistic regression model

| Variables                                 | Model 1          | Model 2          | Model 3          | Model 4          |
|-------------------------------------------|------------------|------------------|------------------|------------------|
|                                           | OR (95%CI)       | OR (95%CI)       | OR (95%CI)       | OR (95%CI)       |
| Age (years)                               |                  |                  |                  |                  |
| 11~13                                     | ref              | ref              | ref              | ref              |
| 14~16                                     | 0.58 (0.33-1.02) | 0.59 (0.34-1.02) | 0.52 (0.29-0.92) | 0.59 (0.34-1.02) |
| Gender                                    |                  |                  |                  |                  |
| Boys                                      | ref              | ref              | ref              | ref              |
| Girls                                     | 0.42 (0.23-0.74) | 0.46 (0.26-0.82) | 0.43 (0.24-0.77) | 0.42 (0.23-0.74) |
| No. of close friends                      |                  |                  |                  |                  |
| 0~3                                       | ref              | ref              | ref              | ref              |
| 4~6                                       | 0.90 (0.47-1.74) | 0.90 (0.47-1.74) | 0.92 (0.47-1.78) | 0.94 (0.49-1.81) |
| ≥7                                        | 1.39 (0.74-2.59) | 1.26 (0.68-2.33) | 1.31 (0.70-2.46) | 1.39 (0.75-2.61) |
| Perceived care from the primary caregiver |                  |                  |                  |                  |
| Lower                                     | ref              | ref              | ref              | ref              |
| Higher                                    | 0.56 (0.31-1.00) | 0.55 (0.31-0.98) | 0.57 (0.31-1.03) | 0.55 (0.31-0.97) |

| Variables                       | Model 1           | Model 2           | Model 3           | Model 4           |
|---------------------------------|-------------------|-------------------|-------------------|-------------------|
|                                 | OR (95%CI)        | OR (95%CI)        | OR (95%CI)        | OR (95%CI)        |
| Only child                      |                   |                   |                   |                   |
| Yes                             | ref               | ref               | ref               | ref               |
| No                              | 1.59 (0.89-2.84)  | 1.58 (0.89-2.82)  | 1.64 (0.91-2.95)  | 1.52 (0.85-2.71)  |
| Neighbors caring for each other |                   |                   |                   |                   |
| Never or seldom                 | ref               | ref               | ref               | ref               |
| Sometimes                       | 0.53 (0.28-0.99)  | 0.57 (0.30-1.06)  | 0.54 (0.28-1.02)  | 0.54 (0.29-1.02)  |
| Always                          | 0.55 (0.28-1.07)  | 0.54 (0.28-1.05)  | 0.51 (0.26-1.00)  | 0.54 (0.28-1.07)  |
| Being bullied within 6 months   |                   |                   |                   |                   |
| No                              | ref               | ref               | ref               | ref               |
| Yes                             | 7.25 (3.67-14.31) | 7.73 (3.91-15.26) | 7.58 (3.83-15.01) | 7.97 (4.04-15.71) |
| Impulsivity                     |                   |                   |                   |                   |
| Lowest tertile                  | ref               | ref               | ref               | ref               |
| Middle tertile                  | 2.30 (0.97-5.44)  | 1.00 (0.47-2.16)  | 0.98 (0.44-2.16)  | 1.06 (0.49-2.27)  |
| Highest tertile                 | 3.62 (1.65-7.94)  | 1.94 (0.99-3.79)  | 3.51 (1.78-6.92)  | 2.04 (1.02-4.08)  |

Note: the impulsivity in the model 1, 2, 3, and 4 refers to the total, attentional, motor, and non-planning impulsivity, respectively.

**Table S3.** Factors associated with physical violence among all samples: results of a multivariable binary logistic regression model

| Variables   | Model 1          | Model 2          | Model 3          | Model 4          |
|-------------|------------------|------------------|------------------|------------------|
|             | OR (95%CI)       | OR (95%CI)       | OR (95%CI)       | OR (95%CI)       |
| Age (years) |                  |                  |                  |                  |
| 11~13       | ref              | ref              | ref              | ref              |
| 14~16       | 0.72 (0.41-1.24) | 0.71 (0.41-1.23) | 0.69 (0.39-1.20) | 0.72 (0.42-1.24) |
| Gender      |                  |                  |                  |                  |

| Variables                                 | Model 1           | Model 2           | Model 3           | Model 4           |
|-------------------------------------------|-------------------|-------------------|-------------------|-------------------|
|                                           | OR (95%CI)        | OR (95%CI)        | OR (95%CI)        | OR (95%CI)        |
| Boys                                      | ref               | ref               | ref               | ref               |
| Girls                                     | 0.40 (0.22-0.71)  | 0.45 (0.25-0.80)  | 0.42 (0.23-0.75)  | 0.40 (0.23-0.72)  |
| No. of close friends                      |                   |                   |                   |                   |
| 0~3                                       | ref               | ref               | ref               | ref               |
| 4~6                                       | 1.26 (0.65-2.45)  | 1.25 (0.65-2.44)  | 1.26 (0.65-2.46)  | 1.28 (0.66-2.47)  |
| ≥7                                        | 1.60 (0.84-3.05)  | 1.46 (0.77-2.78)  | 1.48 (0.78-2.83)  | 1.58 (0.83-3.01)  |
| Perceived care from the primary caregiver |                   |                   |                   |                   |
| Lower                                     | ref               | ref               | ref               | ref               |
| Higher                                    | 0.68 (0.38-1.19)  | 0.68 (0.38-1.20)  | 0.67 (0.38-1.19)  | 0.66 (0.37-1.15)  |
| Only child                                |                   |                   |                   |                   |
| Yes                                       | ref               | ref               | ref               | ref               |
| No                                        | 1.33 (0.72-2.44)  | 1.32 (0.72-2.42)  | 1.34 (0.73-2.47)  | 1.29 (0.71-2.37)  |
| Neighbors caring for each other           |                   |                   |                   |                   |
| Never or seldom                           | ref               | ref               | ref               | ref               |
| Sometimes                                 | 0.64 (0.34-1.21)  | 0.68 (0.36-1.28)  | 0.66 (0.35-1.24)  | 0.66 (0.35-1.23)  |
| Always                                    | 0.57 (0.28-1.13)  | 0.57 (0.29-1.13)  | 0.53 (0.27-1.05)  | 0.54 (0.27-1.08)  |
| Being bullied within 6 months             |                   |                   |                   |                   |
| No                                        | ref               | ref               | ref               | ref               |
| Yes                                       | 7.40 (3.74-14.64) | 7.77 (3.92-15.36) | 7.65 (3.87-15.15) | 8.18 (4.15-16.16) |
| Impulsivity                               |                   |                   |                   |                   |
| Lowest tertile                            | ref               | ref               | ref               | ref               |
| Middle tertile                            | 2.28 (0.97-5.37)  | 1.20 (0.54-2.65)  | 1.51 (0.70-3.24)  | 1.31 (0.63-2.73)  |
| Highest tertile                           | 3.57 (1.62-7.83)  | 2.41 (1.19-4.88)  | 3.13 (1.54-6.34)  | 1.84 (0.91-3.70)  |

Note: the impulsivity in the model 1, 2, 3, and 4 refers to the total, attentional, motor, and non-planning impulsivity, respectively.

**Table S4.** Summary score (mean  $\pm$  SD) of impulsivity, grouping by gender and aggressive behavior

|                   | Boys          |                |                         | Girls         |                |                         |
|-------------------|---------------|----------------|-------------------------|---------------|----------------|-------------------------|
|                   | Aggressors    | Non-aggressors | <i>P</i>                | Aggressors    | Non-aggressors | <i>P</i>                |
| Total impulsivity | 68.07 (11.12) | 60.46 (9.77)   | <0.001 <sup>*</sup>     | 69.79 (12.34) | 60.84 (9.70)   | <0.001 <sup>&amp;</sup> |
| AI                | 18.14 (3.65)  | 16.12 (3.12)   | <0.001 <sup>&amp;</sup> | 17.76 (3.70)  | 15.56 (2.88)   | 0.001 <sup>&amp;</sup>  |
| MI                | 25.04 (5.46)  | 21.81 (4.44)   | <0.001 <sup>&amp;</sup> | 25.70 (5.78)  | 21.86 (4.45)   | <0.001 <sup>&amp;</sup> |
| NPI               | 24.99 (4.90)  | 22.63 (5.14)   | <0.001 <sup>*</sup>     | 26.48 (5.77)  | 23.49 (5.03)   | 0.001 <sup>*</sup>      |

\*: two-independent t-test; &: Wilcoxon test
